# Supplementary material
Source: PubMed Central journal article supplement (PMC4012618)
Supplement: NIHMS568918-supplement-1.pdf [file NIHMS568918-supplement-1.pdf]

## Supporting Figure 1

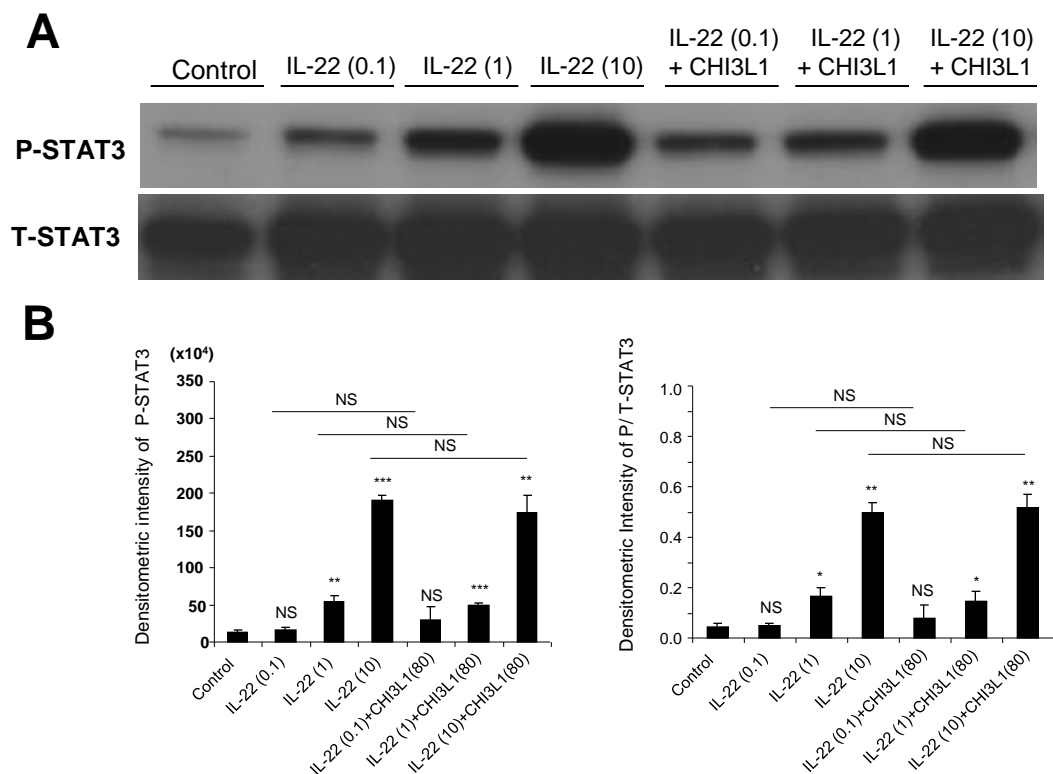

**Supporting Figure 1:**

**Exogenous CHI3L1 stimulation does not show an additive effect in IL-22-mediated STAT3-phosphorylation in C57Bl/6 WT mice-derived colonic crypt cells.**

(A) Colonic crypt cells were freshly isolated from 8-10 weeks old C57Bl/6 WT and stimulated with three different concentrations (0.1, 1.0 or 10 ng/ml) of recombinant mouse recombinant mouse IL-22 and/or purified human CHI3L1 (80 ng/ml) for 15 minutes at 37°C with 5% CO<sub>2</sub>. After stimulations, the samples were lysed and 30 µg/lane of protein lysate was subjected to immunoblot with anti-phospho (P) or anti-total (T) -STAT3 antibodies. (B) Densitometry analysis of phospho-STAT3 signals (left) and phospho-STAT3 signals normalized to total STAT3 signals (right) is shown. \**P*<.05, \*\**P*<.01, \*\*\**P*<.001 and NS, no significant difference (between the indicated groups).
