# Supplementary material
Source: PubMed Central journal article supplement (PMC4012618)
Supplement: NIHMS568918-supplement-2.pdf [file NIHMS568918-supplement-2.pdf]

## Supporting Figure 2

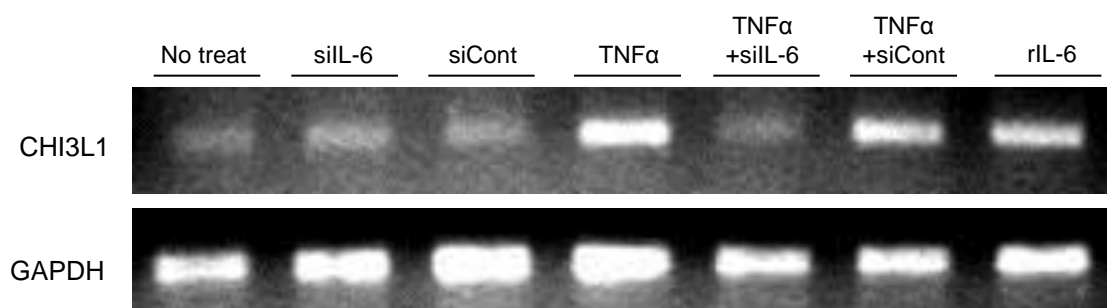

### Supporting Figure 2:

#### **IL-6 regulates the endogenous CHI3L1 mRNA expression in CECs.**

CHI3L1 or  $\beta$ -actin mRNAs were detected in SW480 CECs by reverse-transcription PCR. Cells were stimulated with/without human recombinant-IL-6 (50 ng/ml, 24 hours) or -TNF $\alpha$  (50 ng/ml, 24 hours) treated with/without siRNA-IL-6 or control-siRNA (20  $\mu$ M each, 24 hours).
